# Supplementary material
Source: PubMed Central journal article supplement (PMC7064375)
Supplement: NIHMS1058232-supplement-Supplemental.pdf [file NIHMS1058232-supplement-Supplemental.pdf]

Gene interactions with APOE4 on global cognition

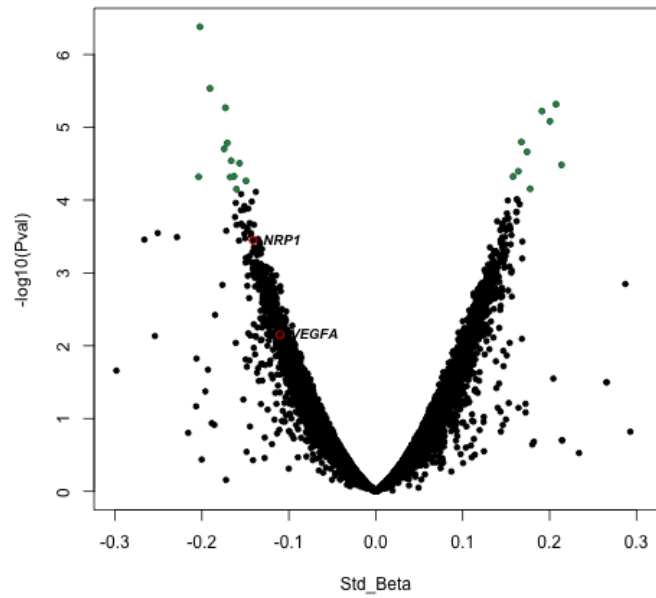

**Supplemental Figure 1.** Volcano plot of gene expression x *APOE*-ε4 allele interaction results. Genes with p.fdr<0.1 are colored in green.

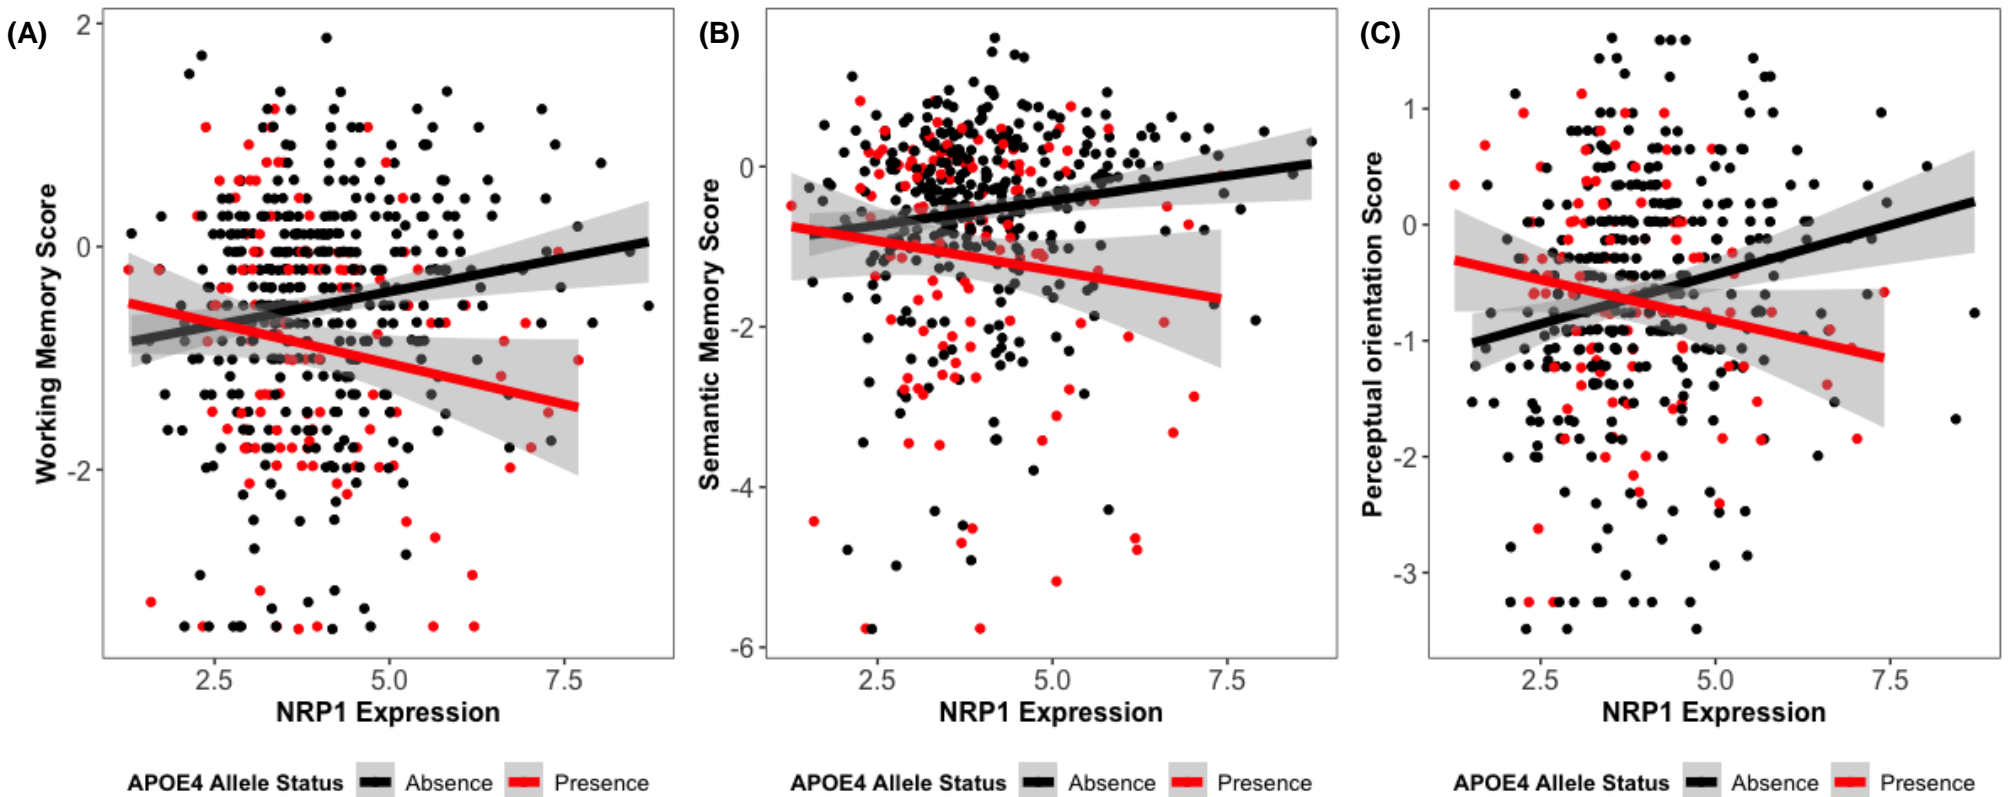

**Supplemental Figure 2.** (A) *NRP1* expression associations with working memory performance at the final psychological assessment, stratified by *APOE-ε4* allele status. Overall interaction: *NRP1*  $\times$  *APOE-ε4*,  $\beta=-0.28$ ,  $p.fdr=0.02$ ; *APOE-ε4* carriers,  $\beta=-0.17$ ,  $p=0.03$ ; *APOE-ε4* non-carriers,  $\beta=0.128$ ,  $p=7E-04$ . (B) *NRP1* expression associations with cross-sectional semantic memory, stratified by *APOE-ε4* allele status. Overall interaction: *NRP1*  $\times$  *APOE-ε4*,  $\beta=-0.31$ ,  $p.fdr=0.03$ ; *APOE-ε4* carriers,  $\beta=-0.19$ ,  $p=0.096$ ; *APOE-ε4* non-carriers,  $\beta=0.12$ ,  $p=0.006$ . (C) *NRP1* expression associations with endpoint perceptual orientation scores, stratified by *APOE-ε4* allele status. Overall interaction: *NRP1*  $\times$  *APOE-ε4*,  $\beta=-0.28$ ,  $p.fdr=0.028$ ; *APOE-ε4* carriers,  $\beta=-0.11$ ,  $p=0.19$ ; *APOE-ε4* non-carriers,  $\beta=0.17$ ,  $p=2E-04$ .

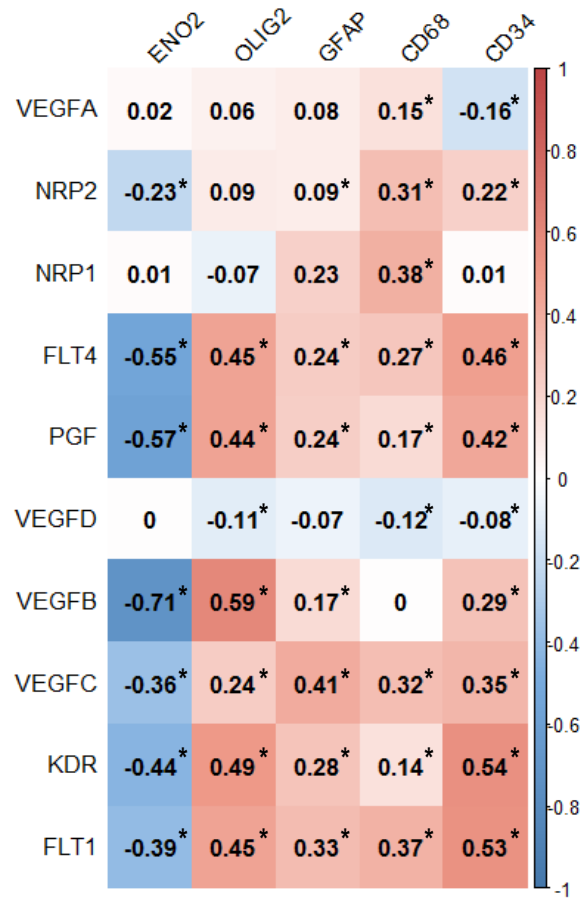

**Supplemental Figure 3.** Correlation matrix for VEGF family gene expression and cell-type marker expression. *ENO2*, neurons; *OLIG2*, oligodendrocytes; *GFAP*, astrocytes; *CD34*, endothelial cells; *CD38*, microglia. \*P<0.05, Pearson's correlation

**Supplementary Table 1. *VEGF* associations with *APOE* genotype**

| <b>Gene</b>  | <b><math>\beta</math></b> | <b>SE</b> | <b>P</b> |
|--------------|---------------------------|-----------|----------|
| <i>FLT4</i>  | 0.10                      | 0.06      | 0.09     |
| <i>FLT1</i>  | 0.62                      | 0.38      | 0.10     |
| <i>NRP1</i>  | -0.19                     | 0.13      | 0.14     |
| <i>KDR</i>   | 0.05                      | 0.04      | 0.23     |
| <i>PGF</i>   | 0.18                      | 0.16      | 0.26     |
| <i>VEGFC</i> | 0.02                      | 0.03      | 0.50     |
| <i>VEGFD</i> | 0.02                      | 0.03      | 0.57     |
| <i>VEGFA</i> | 0.31                      | 1.00      | 0.75     |
| <i>NRP2</i>  | -0.01                     | 0.07      | 0.86     |
| <i>VEGFB</i> | -0.40                     | 2.67      | 0.88     |

**Supplementary Table 2. VEGF x APOE expression on Cognition**

| Gene         | Cross-Sectional |          |      |       | Longitudinal |          |      |       |
|--------------|-----------------|----------|------|-------|--------------|----------|------|-------|
|              | $\beta$         | SE       | P    | p.fdr | $\beta$      | SE       | P    | p.fdr |
| <i>VEGFC</i> | -8.37E-04       | 4.67E-04 | 0.07 | 0.47  | -9.40E-05    | 4.96E-05 | 0.06 | 0.54  |
| <i>NRP2</i>  | -2.13E-04       | 1.28E-04 | 0.10 | 0.47  | -2.03E-05    | 1.37E-05 | 0.14 | 0.54  |
| <i>FLT1</i>  | -3.61E-05       | 2.44E-05 | 0.14 | 0.47  | -2.59E-06    | 2.47E-06 | 0.29 | 0.67  |
| <i>FLT4</i>  | -1.77E-04       | 2.01E-04 | 0.38 | 0.78  | -2.04E-05    | 2.13E-05 | 0.34 | 0.67  |
| <i>NRP1</i>  | -6.60E-05       | 8.76E-05 | 0.45 | 0.78  | -1.31E-05    | 9.36E-06 | 0.16 | 0.54  |
| <i>VEGFB</i> | 1.89E-06        | 2.82E-06 | 0.50 | 0.78  | 1.02E-07     | 2.97E-07 | 0.73 | 0.81  |
| <i>PGF</i>   | 2.82E-05        | 4.81E-05 | 0.56 | 0.78  | 2.69E-06     | 5.21E-06 | 0.61 | 0.76  |
| <i>VEGFD</i> | -1.16E-04       | 2.53E-04 | 0.65 | 0.78  | -6.48E-06    | 2.72E-05 | 0.81 | 0.81  |
| <i>VEGFA</i> | -6.15E-06       | 1.61E-05 | 0.70 | 0.78  | -1.47E-06    | 1.76E-06 | 0.40 | 0.67  |
| <i>KDR</i>   | -4.27E-05       | 2.52E-04 | 0.87 | 0.87  | -1.62E-05    | 2.71E-05 | 0.55 | 0.76  |

**Supplementary Table 3. APOE-ε4 stratified VEGF expression associations with AD Diagnosis**

| Gene         | Interaction |      |                 |              | APOE-ε4 Carriers |      |             |       | APOE-ε4 Non-Carriers |      |                  |             |
|--------------|-------------|------|-----------------|--------------|------------------|------|-------------|-------|----------------------|------|------------------|-------------|
|              | β           | SE   | P               | p.fdr        | β                | SE   | P           | p.fdr | β                    | SE   | P                | p.fdr       |
| <i>NRP1</i>  | 0.77        | 0.27 | <b>3.70E-03</b> | <b>0.037</b> | 0.45             | 0.24 | 0.06        | 0.24  | -0.31                | 0.12 | <b>0.01</b>      | <b>0.03</b> |
| <i>NRP2</i>  | -1.11       | 0.44 | <b>0.01</b>     | 0.06         | -0.86            | 0.40 | <b>0.03</b> | 0.24  | 0.19                 | 0.20 | 0.35             | 0.58        |
| <i>VEGFA</i> | 0.07        | 0.04 | 0.08            | 0.17         | 0.07             | 0.04 | 0.08        | 0.24  | -0.01                | 0.01 | 0.65             | 0.73        |
| <i>PGF</i>   | -0.29       | 0.16 | 0.08            | 0.17         | -0.07            | 0.14 | 0.59        | 0.85  | 0.18                 | 0.09 | <b>0.047</b>     | 0.16        |
| <i>VEGFB</i> | -0.02       | 0.01 | 0.07            | 0.17         | 1.76E-03         | 0.01 | 0.84        | 0.86  | 0.02                 | 0.01 | <b>6.66E-04*</b> | <b>0.01</b> |
| <i>FLT1</i>  | 0.08        | 0.09 | 0.38            | 0.64         | 0.14             | 0.08 | 0.10        | 0.24  | 0.02                 | 0.04 | 0.52             | 0.73        |
| <i>FLT4</i>  | -0.29       | 0.45 | 0.53            | 0.66         | 0.07             | 0.39 | 0.86        | 0.86  | 0.42                 | 0.23 | 0.07             | 0.17        |
| <i>VEGFD</i> | -0.55       | 0.82 | 0.50            | 0.66         | -0.57            | 0.72 | 0.43        | 0.72  | 0.20                 | 0.41 | 0.62             | 0.73        |
| <i>KDR</i>   | -0.21       | 0.70 | 0.76            | 0.85         | 0.28             | 0.68 | 0.68        | 0.85  | 0.08                 | 0.33 | 0.80             | 0.80        |
| <i>VEGFC</i> | 0.10        | 1.21 | 0.93            | 0.93         | 0.93             | 1.14 | 0.41        | 0.72  | 0.49                 | 0.47 | 0.30             | 0.58        |

**Boldface** signifies  $P \leq 0.05$ . \*denotes results that were significant after adjusting for all models tested for main outcomes (cognition, diagnosis)

Supplementary Table 4. *VEGF* x *APOE*- $\epsilon$ 4 interactions on working memory performance

| Gene         | Interaction |      |                 |                 | <i>APOE</i> - $\epsilon$ 4 Carriers |          |             |       | <i>APOE</i> - $\epsilon$ 4 Non-Carriers |          |                 |             |
|--------------|-------------|------|-----------------|-----------------|-------------------------------------|----------|-------------|-------|-----------------------------------------|----------|-----------------|-------------|
|              | $\beta$     | SE   | P               | p.fdr           | $\beta$                             | SE       | P           | p.fdr | $\beta$                                 | SE       | P               | p.fdr       |
| <i>NRP1</i>  | -0.29       | 0.08 | <b>2.46E-04</b> | <b>2.46E-03</b> | -0.17                               | 0.08     | <b>0.03</b> | 0.26  | 0.13                                    | 0.04     | <b>6.87E-04</b> | <b>0.01</b> |
| <i>VEGFA</i> | -0.03       | 0.01 | <b>0.02</b>     | 0.09            | -0.02                               | 0.01     | 0.05        | 0.26  | 0.01                                    | 4.73E-03 | 0.29            | 0.60        |
| <i>KDR</i>   | 0.49        | 0.26 | 0.06            | 0.19            | 0.42                                | 0.27     | 0.12        | 0.30  | -0.10                                   | 0.12     | 0.42            | 0.60        |
| <i>VEGFB</i> | 0.01        | 0.00 | 0.16            | 0.40            | 5.93E-04                            | 3.94E-03 | 0.88        | 0.93  | -4.86E-03                               | 1.80E-03 | 0.01            | 0.04        |
| <i>FLT4</i>  | -0.16       | 0.16 | 0.31            | 0.53            | -0.26                               | 0.16     | 0.10        | 0.30  | -0.08                                   | 0.08     | 0.36            | 0.60        |
| <i>FLT1</i>  | -0.03       | 0.03 | 0.32            | 0.53            | -0.03                               | 0.02     | 0.21        | 0.42  | -3.49E-03                               | 0.01     | 0.79            | 0.79        |
| <i>NRP2</i>  | -0.04       | 0.15 | 0.81            | 0.94            | 0.02                                | 0.15     | 0.89        | 0.93  | 0.06                                    | 0.07     | 0.42            | 0.60        |
| <i>PGF</i>   | -0.01       | 0.06 | 0.85            | 0.94            | -0.04                               | 0.06     | 0.57        | 0.93  | -0.01                                   | 0.03     | 0.72            | 0.79        |
| <i>VEGFD</i> | 0.12        | 0.30 | 0.68            | 0.94            | -0.03                               | 0.29     | 0.93        | 0.93  | -0.16                                   | 0.15     | 0.27            | 0.60        |
| <i>VEGFC</i> | -0.02       | 0.38 | 0.96            | 0.96            | -0.14                               | 0.40     | 0.73        | 0.93  | -0.06                                   | 0.17     | 0.72            | 0.79        |

**Boldface** signifies  $P \leq 0.05$ .

Supplementary Table 5. *VEGF* x *APOE-ε4* interactions on semantic memory performance

| Gene         | Interaction |          |                 |             | <i>APOE-ε4</i> Carriers |      |             |       | <i>APOE-ε4</i> Non-Carriers |      |             |             |
|--------------|-------------|----------|-----------------|-------------|-------------------------|------|-------------|-------|-----------------------------|------|-------------|-------------|
|              | $\beta$     | SE       | P               | p.fdr       | $\beta$                 | SE   | P           | p.fdr | $\beta$                     | SE   | P           | p.fdr       |
| <i>NRP1</i>  | -0.31       | 0.10     | <b>3.35E-03</b> | <b>0.03</b> | -0.19                   | 0.12 | 0.10        | 0.24  | 0.13                        | 0.05 | <b>0.01</b> | <b>0.03</b> |
| <i>VEGFA</i> | -0.04       | 0.01     | <b>0.01</b>     | <b>0.04</b> | -0.03                   | 0.02 | <b>0.04</b> | 0.21  | 0.01                        | 0.01 | 0.37        | 0.62        |
| <i>KDR</i>   | 0.74        | 0.34     | 0.03            | 0.09        | 0.81                    | 0.39 | 0.04        | 0.21  | 0.10                        | 0.15 | 0.48        | 0.69        |
| <i>FLT4</i>  | -0.37       | 0.21     | 0.07            | 0.19        | -0.40                   | 0.22 | 0.08        | 0.24  | -0.04                       | 0.10 | 0.73        | 0.73        |
| <i>VEGFD</i> | 0.48        | 0.37     | 0.20            | 0.33        | 0.36                    | 0.41 | 0.38        | 0.64  | -0.17                       | 0.18 | 0.32        | 0.62        |
| <i>VEGFB</i> | 0.01        | 4.98E-03 | 0.19            | 0.33        | 0.00                    | 0.01 | 0.97        | 0.97  | -0.01                       | 0.00 | 0.00        | 0.03        |
| <i>FLT1</i>  | -0.04       | 0.03     | 0.25            | 0.35        | -0.04                   | 0.04 | 0.29        | 0.58  | 0.01                        | 0.02 | 0.73        | 0.73        |
| <i>NRP2</i>  | 0.06        | 0.19     | 0.76            | 0.84        | 0.12                    | 0.21 | 0.56        | 0.70  | 0.08                        | 0.09 | 0.33        | 0.62        |
| <i>VEGFC</i> | 0.20        | 0.50     | 0.69            | 0.84        | 0.06                    | 0.58 | 0.91        | 0.97  | -0.08                       | 0.21 | 0.71        | 0.73        |
| <i>PGF</i>   | -0.01       | 0.08     | 0.92            | 0.92        | -0.07                   | 0.09 | 0.45        | 0.65  | -0.05                       | 0.04 | 0.16        | 0.54        |

**Boldface** signifies  $P \leq 0.05$ .



Supplementary Table 6. *VEGF* x *APOE-ε4* interactions on perceptual orientation

| Gene         | Interaction |          |                 |             | <i>APOE-ε4</i> Carriers |          |      |       | <i>APOE-ε4</i> Non-Carriers |          |                 |                 |
|--------------|-------------|----------|-----------------|-------------|-------------------------|----------|------|-------|-----------------------------|----------|-----------------|-----------------|
|              | β           | SE       | P               | p.fdr       | β                       | SE       | P    | p.fdr | β                           | SE       | P               | p.fdr           |
| <i>NRP1</i>  | -0.28       | 0.09     | <b>2.77E-03</b> | <b>0.03</b> | -0.11                   | 0.08     | 0.19 | 0.63  | 0.17                        | 0.04     | <b>1.58E-04</b> | <b>1.58E-03</b> |
| <i>NRP2</i>  | -0.13       | 0.16     | 0.44            | 0.82        | 0.07                    | 0.14     | 0.60 | 0.96  | 0.21                        | 0.08     | <b>0.01</b>     | <b>0.04</b>     |
| <i>FLT4</i>  | -0.24       | 0.19     | 0.20            | 0.82        | -0.23                   | 0.16     | 0.15 | 0.63  | 0.01                        | 0.10     | 0.92            | 0.96            |
| <i>VEGFD</i> | -0.15       | 0.33     | 0.65            | 0.82        | -0.05                   | 0.28     | 0.87 | 0.96  | 0.07                        | 0.17     | 0.67            | 0.95            |
| <i>VEGFB</i> | 2.70E-03    | 4.41E-03 | 0.54            | 0.82        | -3.05E-03               | 3.89E-03 | 0.43 | 0.96  | -4.50E-03                   | 2.12E-03 | 0.03            | 0.11            |
| <i>VEGFC</i> | -0.22       | 0.47     | 0.64            | 0.82        | -0.30                   | 0.42     | 0.49 | 0.96  | 0.01                        | 0.20     | 0.96            | 0.96            |
| <i>KDR</i>   | 0.28        | 0.30     | 0.35            | 0.82        | 0.43                    | 0.27     | 0.11 | 0.63  | 0.19                        | 0.14     | 0.17            | 0.33            |
| <i>FLT1</i>  | -0.02       | 0.03     | 0.60            | 0.82        | 4.73E-03                | 0.03     | 0.86 | 0.96  | 0.02                        | 0.02     | 0.11            | 0.27            |
| <i>VEGFA</i> | -4.01E-03   | 0.01     | 0.75            | 0.83        | 3.88E-03                | 0.01     | 0.72 | 0.96  | 0.01                        | 0.01     | 0.20            | 0.33            |
| <i>PGF</i>   | 0.01        | 0.07     | 0.87            | 0.87        | 6.78E-04                | 0.06     | 0.99 | 0.99  | -0.01                       | 0.03     | 0.76            | 0.95            |

**Boldface** signifies  $P \leq 0.05$ .

**Supplementary Table 7. *VEGF* x *APOE*- $\epsilon$ 4 interactions on episodic memory and perceptual speed**

| Gene         | Episodic Memory |          |      |       | Perceptual Speed |          |      |       |
|--------------|-----------------|----------|------|-------|------------------|----------|------|-------|
|              | $\beta$         | SE       | P    | p.fdr | $\beta$          | SE       | P    | p.fdr |
| <i>VEGFA</i> | -0.03           | 0.01     | 0.03 | 0.16  | -4.31E-03        | 0.01     | 0.75 | 0.90  |
| <i>NRP1</i>  | -0.22           | 0.10     | 0.03 | 0.16  | -0.15            | 0.10     | 0.15 | 0.74  |
| <i>VEGFB</i> | 0.01            | 4.56E-03 | 0.08 | 0.19  | 0.00             | 4.32E-03 | 0.78 | 0.90  |
| <i>FLT1</i>  | -0.06           | 0.03     | 0.06 | 0.19  | -0.02            | 0.03     | 0.51 | 0.90  |
| <i>KDR</i>   | 0.51            | 0.32     | 0.11 | 0.22  | 0.18             | 0.31     | 0.55 | 0.90  |
| <i>NRP2</i>  | 0.24            | 0.18     | 0.19 | 0.27  | 0.02             | 0.18     | 0.90 | 0.90  |
| <i>FLT4</i>  | -0.27           | 0.20     | 0.18 | 0.27  | -0.11            | 0.19     | 0.55 | 0.90  |
| <i>PGF</i>   | 0.02            | 0.07     | 0.77 | 0.96  | 0.01             | 0.07     | 0.90 | 0.90  |
| <i>VEGFD</i> | 0.01            | 0.37     | 0.98 | 0.98  | 0.64             | 0.35     | 0.07 | 0.68  |
| <i>VEGFC</i> | 0.01            | 0.49     | 0.98 | 0.98  | 0.20             | 0.47     | 0.68 | 0.90  |

### Supplementary Table 8. *VEGF* x *APOE-ε4* interactions on AD-related pathology

Note: Used square root of continuous variables (amyloid, tangles, nft, neuritic plaques)

| Gene         | Amyloid  |         |     |      | Tangles |         |     |      | NFT      |         |     |      | Neuritic Plaques |         |     |      |
|--------------|----------|---------|-----|------|---------|---------|-----|------|----------|---------|-----|------|------------------|---------|-----|------|
|              | β        | SE      | DF  | P    | β       | SE      | DF  | P    | β        | SE      | DF  | P    | β                | SE      | DF  | P    |
| <i>FLT1</i>  | -0.04    | 0.03    | 514 | 0.17 | 0.02    | 0.03    | 514 | 0.58 | -3.0E-03 | 0.01    | 518 | 0.74 | 7.3E-04          | 0.01    | 518 | 0.95 |
| <i>KDR</i>   | -0.24    | 0.28    | 516 | 0.38 | -0.39   | 0.31    | 516 | 0.20 | -0.09    | 0.09    | 520 | 0.34 | -0.01            | 0.13    | 520 | 0.91 |
| <i>NRP1</i>  | 0.06     | 0.09    | 514 | 0.53 | -0.01   | 0.10    | 514 | 0.90 | -0.02    | 0.03    | 518 | 0.57 | 0.04             | 0.04    | 518 | 0.35 |
| <i>VEGFA</i> | 0.01     | 0.01    | 514 | 0.58 | -0.01   | 0.01    | 514 | 0.31 | -3.3E-03 | 3.8E-03 | 518 | 0.40 | 4.6E-03          | 0.01    | 518 | 0.39 |
| <i>PGF</i>   | 0.03     | 0.07    | 513 | 0.66 | 0.10    | 0.07    | 513 | 0.18 | 0.01     | 0.02    | 517 | 0.76 | 0.01             | 0.03    | 517 | 0.81 |
| <i>VEGFB</i> | -2.3E-03 | 4.1E-03 | 515 | 0.58 | 0.01    | 4.4E-03 | 515 | 0.23 | 5.3E-04  | 1.4E-03 | 519 | 0.70 | 6.5E-04          | 1.8E-03 | 519 | 0.72 |
| <i>FLT4</i>  | 0.07     | 0.18    | 513 | 0.70 | 0.19    | 0.19    | 513 | 0.32 | -0.02    | 0.06    | 517 | 0.79 | 0.03             | 0.08    | 517 | 0.73 |
| <i>NRP2</i>  | -0.05    | 0.17    | 515 | 0.79 | -0.19   | 0.18    | 515 | 0.30 | -0.10    | 0.05    | 519 | 0.07 | -0.08            | 0.07    | 519 | 0.29 |
| <i>VEGFC</i> | -0.13    | 0.42    | 514 | 0.75 | -0.37   | 0.46    | 514 | 0.42 | -0.17    | 0.14    | 518 | 0.21 | -0.01            | 0.19    | 518 | 0.97 |
| <i>VEGFD</i> | 0.02     | 0.33    | 516 | 0.96 | 0.21    | 0.36    | 516 | 0.56 | 0.08     | 0.11    | 520 | 0.47 | 3.9E-03          | 0.15    | 520 | 0.98 |

**Supplementary Table 9. VEGF x APOE-ε4 interactions on nonAD-related pathology**

| Gene         | TDP-43  |         |     |       | CAA     |      |     |      | Atherosclerosis |      |     |      | Arteriolosclerosis |      |     |      |
|--------------|---------|---------|-----|-------|---------|------|-----|------|-----------------|------|-----|------|--------------------|------|-----|------|
|              | β       | SE      | DF  | P     | β       | SE   | DF  | P    | β               | SE   | DF  | P    | β                  | SE   | DF  | P    |
| <i>FLT4</i>  | 0.28    | 0.15    | 462 | 0.059 | -0.42   | 0.31 | 503 | 0.17 | -0.05           | 0.30 | 511 | 0.87 | 0.06               | 0.31 | 512 | 0.85 |
| <i>VEGFB</i> | 4.7E-03 | 3.4E-03 | 465 | 0.17  | 4.4E-03 | 0.01 | 505 | 0.54 | -7.9E-04        | 0.01 | 513 | 0.91 | -4.9E-03           | 0.01 | 514 | 0.49 |
| <i>NRP2</i>  | -0.17   | 0.13    | 464 | 0.19  | -0.05   | 0.29 | 505 | 0.88 | -0.40           | 0.28 | 513 | 0.15 | -0.31              | 0.28 | 514 | 0.27 |
| <i>FLT1</i>  | 0.02    | 0.02    | 463 | 0.32  | 4.9E-03 | 0.05 | 504 | 0.92 | -3.7E-03        | 0.05 | 512 | 0.94 | 0.03               | 0.05 | 513 | 0.55 |
| <i>NRP1</i>  | 0.04    | 0.07    | 463 | 0.53  | -0.08   | 0.15 | 504 | 0.61 | -0.05           | 0.14 | 512 | 0.72 | 0.01               | 0.16 | 513 | 0.92 |
| <i>PGF</i>   | 0.03    | 0.05    | 462 | 0.54  | 0.14    | 0.11 | 503 | 0.21 | -0.04           | 0.11 | 511 | 0.68 | -0.22              | 0.11 | 512 | 0.05 |
| <i>VEGFA</i> | 1.1E-03 | 0.01    | 463 | 0.90  | 0.03    | 0.02 | 504 | 0.12 | -0.01           | 0.02 | 512 | 0.57 | 0.01               | 0.02 | 513 | 0.48 |
| <i>VEGFC</i> | -0.02   | 0.32    | 463 | 0.95  | -0.83   | 0.73 | 504 | 0.25 | 1.10            | 0.72 | 512 | 0.13 | 0.91               | 0.76 | 513 | 0.23 |
| <i>VEGFD</i> | 0.01    | 0.27    | 465 | 0.96  | 0.01    | 0.57 | 506 | 0.99 | 3.6E-03         | 0.55 | 514 | 0.99 | 0.18               | 0.59 | 515 | 0.76 |
| <i>KDR</i>   | -0.01   | 0.23    | 465 | 0.97  | -0.07   | 0.48 | 506 | 0.88 | 0.19            | 0.46 | 514 | 0.68 | -0.08              | 0.50 | 515 | 0.87 |

**Supplementary Table 9 cont. VEGF x APOE-ε4 interactions on nonAD-related pathology**

| Gene         | Hippocampal Sclerosis |      |     |       | Gross infarcts |      |     |      | Microinfarcts |      |     |      |
|--------------|-----------------------|------|-----|-------|----------------|------|-----|------|---------------|------|-----|------|
|              | β                     | SE   | DF  | P     | β              | SE   | DF  | P    | β             | SE   | DF  | P    |
| <i>FLT1</i>  | 0.16                  | 0.10 | 514 | 0.099 | 0.07           | 0.06 | 519 | 0.28 | 0.02          | 0.06 | 519 | 0.69 |
| <i>KDR</i>   | 1.53                  | 0.94 | 516 | 0.101 | -0.18          | 0.71 | 521 | 0.80 | 0.23          | 0.61 | 521 | 0.70 |
| <i>FLT4</i>  | 0.75                  | 0.61 | 513 | 0.22  | 0.08           | 0.42 | 518 | 0.86 | 0.29          | 0.37 | 518 | 0.44 |
| <i>PGF</i>   | 0.15                  | 0.21 | 513 | 0.47  | 0.10           | 0.16 | 518 | 0.52 | -0.07         | 0.14 | 518 | 0.62 |
| <i>VEGFC</i> | -0.97                 | 1.47 | 514 | 0.51  | -0.50          | 1.00 | 519 | 0.62 | 1.26          | 0.88 | 519 | 0.15 |
| <i>VEGFD</i> | 0.65                  | 1.29 | 516 | 0.62  | -1.29          | 0.86 | 521 | 0.13 | -0.38         | 0.69 | 521 | 0.59 |
| <i>NRP2</i>  | -0.26                 | 0.60 | 515 | 0.66  | 0.16           | 0.39 | 520 | 0.68 | 0.21          | 0.35 | 520 | 0.55 |
| <i>VEGFA</i> | -0.02                 | 0.04 | 514 | 0.67  | 3.1E-03        | 0.03 | 519 | 0.91 | 0.01          | 0.02 | 519 | 0.84 |
| <i>NRP1</i>  | -0.09                 | 0.33 | 514 | 0.79  | 0.04           | 0.22 | 519 | 0.85 | -0.02         | 0.20 | 519 | 0.91 |
| <i>VEGFB</i> | -1.7E-03              | 0.01 | 515 | 0.90  | -0.01          | 0.01 | 520 | 0.59 | 1.7E-03       | 0.01 | 520 | 0.84 |

**Supplementary Table 10. VEGFA and NRP1 isoform x APOE-ε4 interactions on cross-sectional global cognition**

| Isoform          | Protein-coding | β     | SE   | P.fdr        | Isoform          | Protein-coding | β     | SE   | P.fdr |
|------------------|----------------|-------|------|--------------|------------------|----------------|-------|------|-------|
| <i>VEGFA-212</i> | No             | -1.37 | 0.37 | <b>0.007</b> | <i>NRP1-214</i>  | Yes            | 1.17  | 0.61 | 0.10  |
| <i>VEGFA-211</i> | No             | -1.07 | 0.36 | <b>0.028</b> | <i>VEGFA-201</i> | Yes            | -0.55 | 0.30 | 0.13  |
| <i>NRP1-202</i>  | Yes            | -4.42 | 1.53 | <b>0.028</b> | <i>NRP1-210</i>  | Yes            | -0.53 | 0.40 | 0.29  |
| <i>NRP1-201</i>  | Yes            | -0.37 | 0.13 | <b>0.028</b> | <i>VEGFA-218</i> | Yes            | -1.86 | 1.48 | 0.32  |
| <i>VEGFA-205</i> | Yes            | -0.05 | 0.02 | <b>0.028</b> | <i>VEGFA-222</i> | Yes            | -0.27 | 0.27 | 0.47  |
| <i>VEGFA-216</i> | No             | -0.22 | 0.08 | <b>0.030</b> | <i>NRP1-212</i>  | Yes            | 0.96  | 1.24 | 0.56  |
| <i>VEGFA-207</i> | Yes            | -3.32 | 1.28 | <b>0.033</b> | <i>VEGFA-204</i> | Yes            | -0.22 | 0.29 | 0.56  |
| <i>NRP1-208</i>  | Yes            | -9.13 | 3.55 | <b>0.033</b> | <i>VEGFA-209</i> | Yes            | -0.11 | 0.15 | 0.56  |
| <i>NRP1-209</i>  | Yes            | -1.12 | 0.44 | <b>0.033</b> | <i>NRP1-203</i>  | Yes            | 3.40  | 4.88 | 0.57  |
| <i>NRP1-205</i>  | Yes            | -1.79 | 0.72 | <b>0.033</b> | <i>VEGFA-206</i> | Yes            | 0.10  | 0.16 | 0.60  |
| <i>VEGFA-214</i> | No             | -0.37 | 0.15 | <b>0.041</b> | <i>NRP1-207</i>  | Yes            | -0.06 | 0.11 | 0.60  |
| <i>VEGFA-215</i> | No             | -0.08 | 0.03 | 0.053        | <i>VEGFA-225</i> | Yes            | -0.05 | 0.48 | 0.95  |
| <i>NRP1-204</i>  | Yes            | 1.90  | 0.98 | 0.10         | <i>NRP1-213</i>  | Yes            | -0.15 | 2.80 | 0.96  |

**Boldface** signifies corrected P.fdr≤0.05.

P.fdr column contains p-values corrected for 26 tests using the false discovery rate (FDR).

### Supplementary Table 11. Cross-sectional *VEGF* x *APOE-ε4* interactions on global cognition adjusted for cell-type effects

Note: ENO2 was used as the marker for neurons, CD68 for microglia, OLIG2 for oligodendrocytes, GFAP for astrocytes, and CD34 for endothelial cells.

Part 1: Correction for ENO2 levels

| Gene         | Cross-sectional Results |       |              | Cross-sectional Results - ENO2 Covariate |      |              | Cross-sectional Results - Adjusted for ENO2 |      |              |
|--------------|-------------------------|-------|--------------|------------------------------------------|------|--------------|---------------------------------------------|------|--------------|
|              | $\beta$                 | SE    | P.fdr        | $\beta$                                  | SE   | P.fdr        | $\beta$                                     | SE   | P.fdr        |
| <i>NRP1</i>  | -0.29                   | 0.08  | <b>0.004</b> | -0.29                                    | 0.08 | <b>0.003</b> | -0.29                                       | 0.08 | <b>0.004</b> |
| <i>VEGFA</i> | -0.03                   | 0.01  | <b>0.026</b> | -0.03                                    | 0.01 | <b>0.016</b> | -0.03                                       | 0.01 | <b>0.026</b> |
| <i>FLT1</i>  | -0.06                   | 0.03  | 0.12         | -0.06                                    | 0.03 | 0.09         | -0.07                                       | 0.03 | <b>0.041</b> |
| <i>FLT4</i>  | -0.24                   | 0.16  | 0.30         | -0.25                                    | 0.16 | 0.32         | -0.43                                       | 0.20 | 0.07         |
| <i>VEGFB</i> | 0.01                    | 0.004 | 0.30         | 0.01                                     | 0.00 | 0.34         | 0.01                                        | 0.01 | 0.23         |
| <i>KDR</i>   | 0.29                    | 0.26  | 0.43         | 0.29                                     | 0.25 | 0.42         | 0.31                                        | 0.28 | 0.46         |
| <i>VEGFD</i> | 0.24                    | 0.31  | 0.62         | 0.28                                     | 0.30 | 0.51         | 0.23                                        | 0.30 | 0.57         |
| <i>PGF</i>   | -0.02                   | 0.06  | 0.81         | -0.03                                    | 0.06 | 0.75         | -0.07                                       | 0.08 | 0.48         |
| <i>VEGFC</i> | -0.14                   | 0.39  | 0.81         | -0.13                                    | 0.39 | 0.75         | -0.21                                       | 0.42 | 0.68         |
| <i>NRP2</i>  | 0.02                    | 0.15  | 0.88         | 0.05                                     | 0.15 | 0.75         | 0.02                                        | 0.16 | 0.91         |

**Boldface** signifies corrected P.fdr $\leq$ 0.05.

P.fdr column contains p-values corrected for 10 tests using the false discovery rate (FDR).

Part 2: Adjusting for expression of other cell-type markers

| Gene         | Cross-sectional Results |       |              | Cross-sectional Results - OLIG2, GFAP, CD68, and CD34 Covariates |      |              | Cross-sectional Results - Adjusted for OLIG2 |      |              | Cross-sectional Results - Adjusted for GFAP |      |              | Cross-sectional Results - Adjusted for CD68 |      |              | Cross-sectional Results - Adjusted for CD34 |      |              |
|--------------|-------------------------|-------|--------------|------------------------------------------------------------------|------|--------------|----------------------------------------------|------|--------------|---------------------------------------------|------|--------------|---------------------------------------------|------|--------------|---------------------------------------------|------|--------------|
|              | $\beta$                 | SE    | P.fdr        | $\beta$                                                          | SE   | P.fdr        | $\beta$                                      | SE   | P.fdr        | $\beta$                                     | SE   | P.fdr        | $\beta$                                     | SE   | P.fdr        | $\beta$                                     | SE   | P.fdr        |
| <i>NRP1</i>  | -0.29                   | 0.08  | <b>0.004</b> | -0.30                                                            | 0.08 | <b>0.003</b> | -0.29                                        | 0.08 | <b>0.004</b> | -0.30                                       | 0.09 | <b>0.005</b> | -0.25                                       | 0.08 | <b>0.028</b> | -0.29                                       | 0.08 | <b>0.003</b> |
| <i>VEGFA</i> | -0.03                   | 0.01  | <b>0.026</b> | -0.03                                                            | 0.01 | <b>0.031</b> | -0.03                                        | 0.01 | <b>0.027</b> | -0.02                                       | 0.01 | 0.13         | -0.02                                       | 0.01 | 0.14         | -0.03                                       | 0.01 | <b>0.011</b> |
| <i>FLT1</i>  | -0.06                   | 0.03  | 0.12         | -0.07                                                            | 0.03 | 0.057        | -0.08                                        | 0.03 | <b>0.036</b> | -0.04                                       | 0.03 | 0.31         | -0.04                                       | 0.03 | 0.30         | -0.06                                       | 0.03 | 0.18         |
| <i>FLT4</i>  | -0.24                   | 0.16  | 0.30         | -0.22                                                            | 0.17 | 0.43         | -0.29                                        | 0.18 | 0.24         | -0.14                                       | 0.17 | 0.68         | -0.13                                       | 0.17 | 0.63         | -0.27                                       | 0.19 | 0.28         |
| <i>VEGFB</i> | 0.01                    | 0.004 | 0.30         | 0.01                                                             | 0.00 | 0.43         | 0.01                                         | 0.00 | 0.24         | 0.01                                        | 0.00 | 0.31         | 0.01                                        | 0.00 | 0.30         | 0.01                                        | 0.00 | 0.22         |
| <i>KDR</i>   | 0.29                    | 0.26  | 0.43         | 0.19                                                             | 0.27 | 0.73         | 0.34                                         | 0.28 | 0.39         | 0.39                                        | 0.26 | 0.31         | 0.32                                        | 0.26 | 0.44         | 0.45                                        | 0.29 | 0.23         |
| <i>VEGFD</i> | 0.24                    | 0.31  | 0.62         | 0.15                                                             | 0.31 | 0.79         | 0.25                                         | 0.30 | 0.60         | 0.22                                        | 0.31 | 0.68         | 0.18                                        | 0.31 | 0.70         | 0.22                                        | 0.31 | 0.68         |
| <i>PGF</i>   | -0.02                   | 0.06  | 0.81         | -0.04                                                            | 0.07 | 0.73         | -0.04                                        | 0.07 | 0.66         | 0.01                                        | 0.06 | 0.82         | 0.00                                        | 0.06 | 1.00         | -0.02                                       | 0.07 | 0.84         |
| <i>VEGFC</i> | -0.14                   | 0.39  | 0.81         | -0.13                                                            | 0.42 | 0.85         | -0.13                                        | 0.40 | 0.83         | 0.24                                        | 0.41 | 0.69         | 0.08                                        | 0.41 | 0.93         | 0.10                                        | 0.43 | 0.84         |
| <i>NRP2</i>  | 0.02                    | 0.15  | 0.88         | 0.01                                                             | 0.16 | 0.97         | 0.02                                         | 0.15 | 0.87         | 0.04                                        | 0.16 | 0.82         | 0.15                                        | 0.16 | 0.58         | 0.03                                        | 0.15 | 0.84         |



### Supplementary Table 12. Longitudinal *VEGF* x *APOE-ε4* interactions on global cognition adjusted for cell-type effects

Note: *ENO2* was used as the marker for neurons, *CD68* for microglia, *OLIG2* for oligodendrocytes, *GFAP* for astrocytes, and *CD34* for endothelial cells.

Part 1: Adjusting for *ENO2* expression

| Gene         | Longitudinal Results |          |       | Longitudinal Results - <i>ENO2</i> Covariate |         |       | Longitudinal Results - Adjusted for <i>ENO2</i> |         |       |
|--------------|----------------------|----------|-------|----------------------------------------------|---------|-------|-------------------------------------------------|---------|-------|
|              | $\beta$              | SE       | P.fdr | $\beta$                                      | SE      | P.fdr | $\beta$                                         | SE      | P.fdr |
| <i>NRP1</i>  | -0.02                | 0.01     | 0.44  | -0.02                                        | 0.01    | 0.46  | -0.01                                           | 0.01    | 0.57  |
| <i>KDR</i>   | 0.04                 | 0.03     | 0.44  | 0.04                                         | 0.03    | 0.46  | 0.04                                            | 0.03    | 0.57  |
| <i>VEGFB</i> | 0.001                | 4.16E-04 | 0.44  | 5.9E-04                                      | 4.2E-04 | 0.46  | 4.0E-04                                         | 6.1E-04 | 0.64  |
| <i>VEGFA</i> | -0.002               | 0.001    | 0.44  | -1.6E-03                                     | 1.2E-03 | 0.46  | -1.5E-03                                        | 1.2E-03 | 0.57  |
| <i>VEGFD</i> | 0.04                 | 0.03     | 0.57  | 0.04                                         | 0.03    | 0.56  | 0.03                                            | 0.03    | 0.57  |
| <i>NRP2</i>  | 0.01                 | 0.02     | 0.82  | 0.01                                         | 0.02    | 0.83  | 0.01                                            | 0.02    | 0.73  |
| <i>VEGFC</i> | 0.02                 | 0.04     | 0.87  | 0.02                                         | 0.04    | 0.86  | 1.1E-03                                         | 0.05    | 0.98  |
| <i>FLT4</i>  | -0.01                | 0.02     | 0.90  | -0.01                                        | 0.02    | 0.90  | -0.03                                           | 0.02    | 0.57  |
| <i>FLT1</i>  | -4.65E-04            | 0.003    | 0.92  | -4.3E-04                                     | 2.9E-03 | 0.93  | -2.1E-03                                        | 3.2E-03 | 0.64  |
| <i>PGF</i>   | 0.001                | 0.01     | 0.92  | 6.1E-04                                      | 0.01    | 0.93  | -0.01                                           | 0.01    | 0.57  |

Part 2: Adjusting for expression of other cell-type markers

| Gene         | Longitudinal Results |          |       | Longitudinal Results - <i>OLIG2</i> ,<br><i>GFAP</i> , <i>CD68</i> , and <i>CD34</i><br>Covariates |         |       | Longitudinal Results - Adjusted<br>for <i>OLIG2</i> |         |       | Longitudinal Results -<br>Adjusted for <i>GFAP</i> |         |       |
|--------------|----------------------|----------|-------|----------------------------------------------------------------------------------------------------|---------|-------|-----------------------------------------------------|---------|-------|----------------------------------------------------|---------|-------|
|              | $\beta$              | SE       | P.fdr | $\beta$                                                                                            | SE      | P.fdr | $\beta$                                             | SE      | P.fdr | $\beta$                                            | SE      | P.fdr |
| <i>NRP1</i>  | -0.02                | 0.01     | 0.44  | -0.02                                                                                              | 0.01    | 0.64  | -0.01                                               | 0.01    | 0.49  | -0.02                                              | 0.01    | 0.53  |
| <i>KDR</i>   | 0.04                 | 0.03     | 0.44  | 0.04                                                                                               | 0.03    | 0.64  | 0.05                                                | 0.03    | 0.49  | 0.05                                               | 0.03    | 0.53  |
| <i>VEGFB</i> | 0.001                | 4.16E-04 | 0.44  | 5.7E-04                                                                                            | 4.4E-04 | 0.64  | 7.3E-04                                             | 5.2E-04 | 0.49  | 5.6E-04                                            | 4.2E-04 | 0.53  |
| <i>VEGFA</i> | -0.002               | 0.001    | 0.44  | -1.3E-03                                                                                           | 1.2E-03 | 0.64  | -1.5E-03                                            | 1.2E-03 | 0.49  | -1.2E-03                                           | 1.2E-03 | 0.53  |
| <i>VEGFD</i> | 0.04                 | 0.03     | 0.57  | 0.03                                                                                               | 0.03    | 0.64  | 0.04                                                | 0.03    | 0.56  | 0.04                                               | 0.03    | 0.53  |
| <i>NRP2</i>  | 0.01                 | 0.02     | 0.82  | 0.01                                                                                               | 0.02    | 0.73  | 0.01                                                | 0.02    | 0.71  | 0.01                                               | 0.02    | 0.62  |
| <i>VEGFC</i> | 0.02                 | 0.04     | 0.87  | 0.03                                                                                               | 0.05    | 0.73  | 0.02                                                | 0.05    | 0.71  | 0.05                                               | 0.05    | 0.53  |
| <i>FLT4</i>  | -0.01                | 0.02     | 0.90  | -1.4E-03                                                                                           | 0.02    | 0.94  | -0.01                                               | 0.02    | 0.71  | -1.3E-03                                           | 0.02    | 0.95  |
| <i>FLT1</i>  | -4.65E-04            | 0.003    | 0.92  | -8.3E-04                                                                                           | 3.2E-03 | 0.94  | -1.8E-03                                            | 3.3E-03 | 0.71  | 7.8E-04                                            | 3.0E-03 | 0.88  |
| <i>PGF</i>   | 0.001                | 0.01     | 0.92  | -6.4E-04                                                                                           | 0.01    | 0.94  | -2.1E-03                                            | 0.01    | 0.79  | 2.8E-03                                            | 0.01    | 0.87  |

Part 3: Adjusting for expression of other cell-type markers

| Gene         | Longitudinal Results |          |       | Longitudinal Results - Adjusted for<br><i>CD68</i> |         |       | Longitudinal Results - Adjusted for<br><i>CD34</i> |         |       |
|--------------|----------------------|----------|-------|----------------------------------------------------|---------|-------|----------------------------------------------------|---------|-------|
|              | $\beta$              | SE       | P.fdr | $\beta$                                            | SE      | P.fdr | $\beta$                                            | SE      | P.fdr |
| <i>NRP1</i>  | -0.02                | 0.01     | 0.44  | -0.01                                              | 0.01    | 0.49  | -0.01                                              | 0.01    | 0.37  |
| <i>KDR</i>   | 0.04                 | 0.03     | 0.44  | 0.04                                               | 0.03    | 0.49  | 0.05                                               | 0.03    | 0.37  |
| <i>VEGFB</i> | 0.001                | 4.16E-04 | 0.44  | 6.2E-04                                            | 4.2E-04 | 0.49  | 6.7E-04                                            | 4.4E-04 | 0.37  |
| <i>VEGFA</i> | -0.002               | 0.001    | 0.44  | -1.2E-03                                           | 1.2E-03 | 0.51  | -1.7E-03                                           | 1.2E-03 | 0.37  |
| <i>VEGFD</i> | 0.04                 | 0.03     | 0.57  | 0.04                                               | 0.03    | 0.51  | 0.03                                               | 0.03    | 0.62  |
| <i>NRP2</i>  | 0.01                 | 0.02     | 0.82  | 0.02                                               | 0.02    | 0.49  | 0.01                                               | 0.02    | 0.71  |
| <i>VEGFC</i> | 0.02                 | 0.04     | 0.87  | 0.04                                               | 0.05    | 0.54  | 0.04                                               | 0.05    | 0.64  |
| <i>FLT4</i>  | -0.01                | 0.02     | 0.90  | -6.3E-04                                           | 0.02    | 0.98  | -0.01                                              | 0.02    | 0.94  |
| <i>FLT1</i>  | -4.65E-04            | 0.003    | 0.92  | 6.9E-05                                            | 3.0E-03 | 0.98  | -2.6E-04                                           | 3.3E-03 | 0.94  |
| <i>PGF</i>   | 0.001                | 0.01     | 0.92  | 2.2E-03                                            | 0.01    | 0.94  | 6.0E-04                                            | 0.01    | 0.94  |
